# Supplementary material for: A Web-based spatial decision supporting system for land management and soil conservation
Source: Copernicus journal article supplement (doi:10.5194/se-6-903-2015), 2015-07-28
Supplement: Supplementary file 1 [file se-6-903-2015-supplement.pdf]

Supplement of Solid Earth, 6, 903–928, 2015  
<http://www.solid-earth.net/6/903/2015/>  
doi:10.5194/se-6-903-2015-supplement  
© Author(s) 2015. CC Attribution 3.0 License.

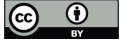

*Supplement of*

## **A Web-based spatial decision supporting system for land management and soil conservation**

**F. Terribile et al.**

*Correspondence to:* F. Terribile (fabio.terribile@unina.it)

The copyright of individual parts of the supplement might differ from the CC-BY 3.0 licence.

# Supplementary material

## COMPLEMENTARY INFORMATION ABOUT THE OLIVE GROWING TOOL

### Further information about the background

It has been said that olive tree cultivation in Valle Telesina has a very long tradition and that in last decades it has been overwhelmed by vineyards. In fact in last decades vineyard cultivation has shown to be a much better business than olive growing. This is inducing a sort of monoculture which is not good for ACP policy and the Agricultural Compliance system (Reg. EU 1303/2013; 1782/03) that focuses on biodiversity and soil conservation achieving more resilient agriculture systems. Moreover, olive grove farmers are seeking support in their effort to obtain a proper designation of origin labels for their olive oil.

### Further information about main issues and main stakeholders of olive growing

Below we report the main agriculture issues (named A hereafter ) related to olive grove in Valle Telesina.

Issue A1: In this situation public authorities are trying to stimulate alternative land uses with respect to vineyards by providing a specific Decree (D.M. 350/99) produced by the Italian Agriculture Ministry to preserve high quality oil (Olio extravergine di Oliva Sannio Caudino Telesino; further info at [http://www.agricoltura.regione.campania.it/Tipici/prodotti\\_tradizionali.htm](http://www.agricoltura.regione.campania.it/Tipici/prodotti_tradizionali.htm)). This relates to the production sites in Valle Telesina. This Decree of 1999 has not produced the desired results in terms of an increase in olive growth cultivation. The local region (Regione Campania) is therefore exploring alternative ways to promote olive growing in the Valle Telesina.

The main stakeholders and communities affected by issue A1 are: (a) the Agriculture Department of Regione Campania who has the problem to implement measures of the Rural Development Plan (on the basis of the ACP) with respect to olive tree cultivation, (b) olive grove farmers who have to promote their production and (c) local associations of olive oil producers (olive oil mills) who have to promote and market the importance of their olive oil.

Issue A2: Another difficulty for olive grove cultivation in Valle Telesina is the evidence that local farmers have very little technical assistance to proper planning (e.g. choice of varieties) and management during the growing season of their olive growing sites. Moreover, olive growing is so far a rather low-income business and involving private consultants is therefore not an attainable option.

The main stakeholders affected by issue A2 are not only farmers who require technical help but also the technical assistance office (named SESIRCA) of the Agriculture Department of Regione Campania. In fact, due to sever budget cuts ,SESIRCA is not anymore in the position to provide the required technical assistance to olive growing farmers following the traditional extension procedures. Introduction of innovative, information-based computer systems might well allow rejuvenation of their role in future.

### Further information about implemented SOILCONSWEB solution

The SOILCONSWEB CGI system has been designed to support decision making towards both issues A1 and A2. A scheme of its main functionalities is reported in fig. SM15 which illustrates the hierarchical structure of the Olive growing tool; this includes many sub-tools in order to allow the end-user to deal with issues A1 and A2. They are (i) "Internet GIS" facilities (allowing to use GIS procedures without having a GIS desktop software), (ii) "Go and discover your landscape" (this produces a general overview of physical parameters of the AOI), (iii)

1 “Label of your olive grove” (this enables the user to obtain an environmental and bioclimatic label of the AOI;  
2 (iv) “Support to the knowledge of your olive grove farm” (which can obtain mapping support) (e.g. olive tree  
3 varieties) for olive grove planning and (v) “Support to the management of your olive grove farm” (to assist in  
4 olive grove management).  
5 In table SM1 details are given examples about addressed problems/employed tools/outputs for each category  
6 of end-user.  
7 For instance end-users A1.1 - in order to design RDP measures (where/how/ to whom propose EU subsidies)  
8 for olive grove farmers - require operational Internet GIS tool (most local regional offices dealing with RDP do  
9 not have access to desktop GIS software) using official databases. In this way they can access olive grove  
10 suitability maps, bioclimatic indexes, soil maps for evaluating whether a specific territory is suitable to receive  
11 EU subsidy for olive growing.  
12 End-user A1.2 are looking for “new ways” to help the marketing of their high quality olive grove-oil  
13 productions. Similarly to what happen to wine they were looking for “ways” to associate their olive oil  
14 production with a specific terroir in order to communicate to the consumer this association. Currently in Valle  
15 Telesina there are over 3190 ha of olive grove with few hundreds olive farmers, then it was required to find a  
16 general operational solution to support any farmer/olive mill to better market their olives/oil. Then in  
17 SOILCONSWEB-CGI it was developed the tool “label of your olive grove” where the farmer can select (using a  
18 PC mouse) his farm and in real time it can obtain an environmental label (soil, geology, climate, last rain etc.) of  
19 his olive grove.  
20 End-user A2.1 and A2.2 refer to farmers who – in absence of a public technical consultancy – aim to use the  
21 system to support their choice about selected technicalities such as choice of most suitable olive varieties  
22 and/or data about farm management (trend in rain, temperature, etc.)  
23 End-user A2.3 are public body who is interested in evaluating the use of the system to populate the Regional  
24 Bulletin (Bollettino Fitosanitario Regione Campania) with an olive fly potential disease index (strongly  
25 connected to temperature gradient).  
26 It is rather evident that each of the above applications for end-users would indeed require a very detailed  
27 description (and possibly an entire paper).

28

29

## 30 **COMPLEMENTARY INFORMATION ABOUT THE GROUNDWATER PROTECTION TOOL**

### 31 Further information about the background

32 It has been said about the many EU (and national) regulations aiming to protect groundwater from pollution  
33 (Nitrates Directive (Dir. 91/676), Water Framework Directive (Dir.60/00), Soil Thematic Strategy (COM  
34 2006/231), Groundwater against pollution Directive (Dir. 80/68), Sewage sludge Directive (Dir. 86/276),  
35 Compliance System in Agriculture (Reg. (EC) 1782/031783/05ACP) and the evidence that there are still many  
36 problems in achieving an amelioration of groundwater pollution (e.g. COM2015/120; COM2013/683).  
37 Here we aim to stress that a key problem relies on the evidence that the full implementation of many  
38 directives about water quality/quantity in turn requires for a full competence (and managing capability) about  
39 the landscape, its multi-functionality, its dynamic nature (many processes, including fate of pollutants, are  
40 dynamic), required actions at local scale (many processes are site specific): in a single word, the main difficulty

1 is coping with the inherent complexity of soils and landscapes. Most current approaches are not challenging  
2 this complexity, offering a simplistic, spatially aggregated and fragmented view of the problem. Moving  
3 towards local scale, in such complex scenario also Regione Campania administration is very much affected (e.g.  
4 infringement procedures by European Commission) and then it is looking for a better implementation of the  
5 above European directives.

6

#### 7 Further information about main issues and main stakeholders of groundwater protection

8 The main environmental issues (named E) dealing with the groundwater topic in Valle Telesina are given below.

9 Issue E1: For implementing Water Framework Directive and Nitrate Directives, the Campania Region (as other  
10 European administrative regions) has the obligation to regularly update Nitrate Vulnerable Zones (in Italian  
11 named as ZVN) where Action Plans have to be applied to fulfill the required reduction in nitrate leaching  
12 towards groundwater. Then Campania Region is looking for procedures aiming to ameliorate ZVN delineation  
13 also in perspective of other pollutants. In terms of soil information, current delineation are based on empirical  
14 rules (only based on soil texture and soil organic matter content) of benchmark soils.

15 Issue E2: For the same reason of issue E1, Campania Region is looking for procedure to update and ameliorate  
16 the Action Plans for nitrate (formally regulated by DGR 209/2007). Current Action Plans are based on empirical  
17 rules of good agronomic practices.

18 Issue E3: Campania Region consider very important the critical issues of agronomic use of sewage sludge  
19 distribution and protection of water against pollution by nitrates from agricultural sources protection  
20 (regulated by DRD n. 160 of 22.04.2013 published in the Official Bulletin of Campania Region n. 22 of 29 April  
21 2013; Technical Appendix at [http://www.agricoltura.regione.campania.it/reflui/pdf/DRD\\_160-22-04-13.pdf](http://www.agricoltura.regione.campania.it/reflui/pdf/DRD_160-22-04-13.pdf)).

22 Here the criteria for the derogation from the prohibition of spreading time (typically occurring between 1<sup>st</sup>  
23 December to middle February) are based on a special regional bulletin that takes into account rainfall and  
24 types of soils. Campania Region is evaluating whether is feasible to update and ameliorate the technical  
25 procedures employed in this bulletin. This entire issue is a rather hot topic in both policy and agriculture (in  
26 Italy and in many EU countries) because farmers have to stock very large amount of sewage in their farms  
27 independently by actual soil conditions.

28 Issue E4: Starting from this year, the Agriculture European Compliance System obliges farmers seeking financial  
29 support by EU to deliver also in terms of water and nitrate directives. In such framework, farmers require  
30 support in their land management to access EU aids.

31 The main bodies interested by issue E1, E2 and E3 is the Campania Region who is in charge of the  
32 implementation of the above regulations while E4 is an issue for farmers.

33

#### 34 Further information about implemented SOILCONSWEB solution

35 The SOILCONSWEB CGI system has been designed to support decision-making in contributing towards issues  
36 1,2,3,4. A scheme of its main functionalities is reported in fig. SM1 which illustrates the hierarchical structure of  
37 the tool; this includes some sub-tools. They are “Internet GIS” facilities which enable the use of GIS procedures  
38 without having a GIS desktop software, “Intrinsic Soil Protective Capability” which refer to a potential estimates  
39 of the intrinsic soil capacity to protect groundwater from pollution calculated on a set of climatic years  
40 (climate for 30 years from 1961 to 1990 taken as reference, Basile & Terribile, 2008; Manna et al. 2009) and  
41 eventually the “Interactive Estimate of Soil Protection Capacity” here an opportunity is given to the user in

1 order to evaluate the current protection capability by using current climate data and selecting the crop of  
2 interest in the selected AOI.

3 In table SM1 details are given about addressed problem/employed tools/outputs for each category of end-  
4 user.

5 For instance end-users E1 - in order to update Vulnerable Zones (to be proposed to the Ministry of  
6 Environment and EU Commission DG-ENV) – can use - for the Valle Telesina territory - both the operational  
7 Internet GIS tool but most importantly the tool of “Potential protective capability towards groundwater  
8 pollution” to estimate (with the support of modelling) potential vulnerable zones.

9 End-users E2 in order to update/ameliorate Action Plans (to be proposed to the Ministry of Environment and  
10 EU Commission DG-ENV) – can use - for the Valle Telesina territory – the tool of “Actual protective capability  
11 towards groundwater pollution” to estimate whether a specific soil-crop combination maybe more/less  
12 protective in terms of limiting pollutant leaching towards groundwater. This information can then be  
13 incorporated into guidelines of Action Plans.

14 End-users E3.1 have the very difficult role of establishing criteria for the derogation from the prohibition of  
15 sewage sludge distribution to soil. They can use both the tool “Actual protective capability towards  
16 groundwater pollution” and “Estimate current soil water content” to evaluate whether to include this  
17 additional parameter in the above criteria then diminishing the dispute about the current empirical approach  
18 ([http://www.agricoltura.regione.campania.it/reflui/pdf/DRD\\_160-22-04-13.pdf](http://www.agricoltura.regione.campania.it/reflui/pdf/DRD_160-22-04-13.pdf)).

19 End-users E3.2 are farmers (or farmer association) who have to apply (through local municipalities) to the  
20 Campania Region asking to obtain a derogation from the prohibition of sewage sludge distribution to soil  
21 typically applying in the period 1st December- 15<sup>th</sup> February of each year. This end-user can use the system to  
22 evaluate whether his farm (or sets of farms) have a current (at day scale) soil index of soil protection  
23 appropriate to apply for derogation (the law established that if rains occur during the formal application  
24 procedure, the derogation has to be considered not valid). This document can support the farm application.

25 End-user E4 are farmers (or association supporting farmers) who are willing to get EU subsidies regarding  
26 greening measures incorporated (from year 2015) into the EU Compliance System. These end-user by  
27 producing – on their farm - queries using tool “Actual protective capability towards groundwater pollution” in  
28 case their soil is protective, can support (on a voluntary base) their application with the documentation  
29 obtained by the SOILCONSWEB GCI system.

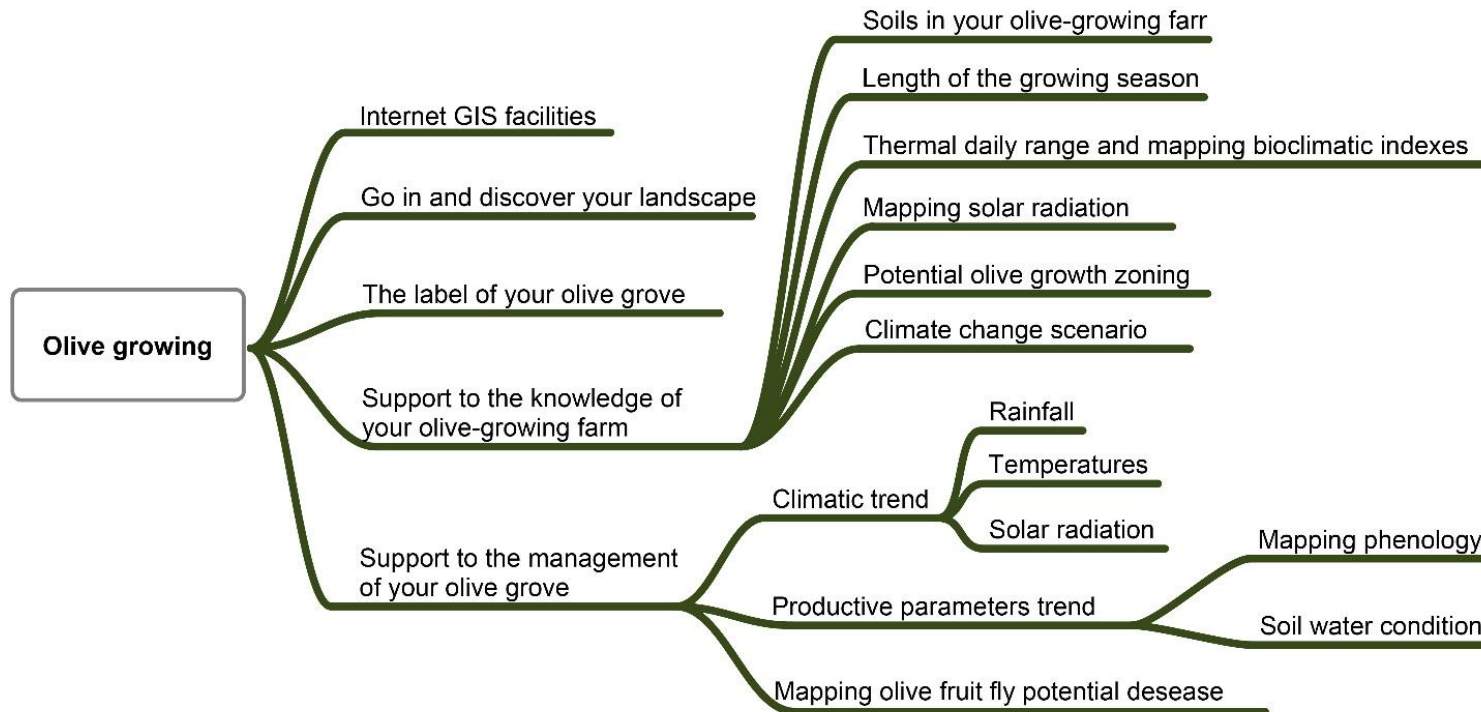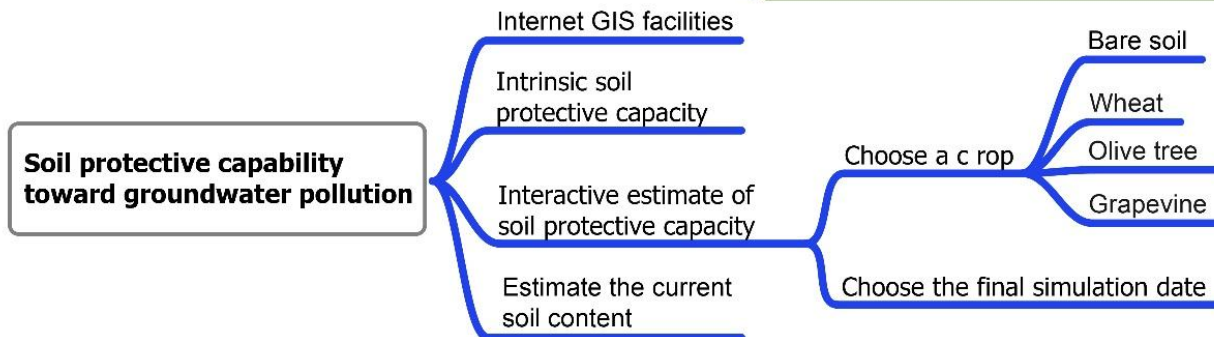

## Figure captions

**Fig. SM1 Supplementary material.** Conceptual map illustrating the main themes of the Agriculture and Forestry dashboard; the **Olive growing** dashboard is presented as an example

| Theme                                         | Issue | End-user (stakeholders)                                                               | Problem to address                                                      | Employed tool                                                                            | Output (example)                                                                                                       |
|-----------------------------------------------|-------|---------------------------------------------------------------------------------------|-------------------------------------------------------------------------|------------------------------------------------------------------------------------------|------------------------------------------------------------------------------------------------------------------------|
| Olive growing dashboard                       | A1    | A1.1.Agriculture Department of Regione Campania                                       | Design Rural Development Plan measures                                  | Internet GIS facilities                                                                  | Maps (e.g. olive tree suitability) to evaluate impact of RDP measures,                                                 |
|                                               |       | A1.2 Olive growth farmers and oil mill associations                                   | Helping marketing olive oil using terroir info                          | Go and discover your landscape Label of your olive grove                                 | Terroir info to be reported in olive oil labels                                                                        |
|                                               | A2    | A2.1 Olive growth farmers                                                             | Olive grove planning                                                    | Support to the knowledge of your olive grove farm                                        | Climate and soil info to choose olive varieties                                                                        |
|                                               |       | A2.2.Olive growth farmers                                                             | Olive grove management                                                  | Support to the management of your olive grove farm                                       | Trends in current climate and production parameters                                                                    |
|                                               |       | A2.3 SESIRCA – Regione Campania                                                       | Technical assistance to olive growing farmers                           | Support to the management of your olive grove farm                                       | Trends in current climate, production and potential olive fly attack parameters                                        |
| Soil protection towards groundwater dashboard | E1    | E1.1 Agriculture Department of Regione Campania; E1.2 Ministry Environment            | Update of Nitrate Vulnerable Zones                                      | Internet GIS facilities Intrinsic Soil Protective Capacity                               | Maps (e.g.low protective soils, hydrogeology, land use) to evaluate update of vulnerable zones,                        |
|                                               | E2    | E2.1Agriculture Department of Regione Campania; E2.2 Ministry Environment             | Update and ameliorate the Action Plans for nitrate and other pollutants | Interactive Estimate of Soil Protection Capacity                                         | Evaluation of the interaction climate-soil-crop in determining protection towards groundwater. Support for guidelines. |
|                                               | E3    | E3.1 Agriculture Department of Regione Campania; E3.2 Farmers and farmer associations | Criteria for the derogation sludge rules                                | Interactive Estimate of Soil Protection Capacity and Estimate current soil water content | Soil water content to be incorporated into guidelines                                                                  |
|                                               | E4    | E4. Farmers and farmer associations                                                   | Support to farmer application for EU subsidies (Compliance System)      | Interactive Estimate of Soil Protection Capacity                                         | Evaluation of management units of farm in current protection towards groundwater.                                      |

**Table SM1 Supplementary material .** Details about olive growing and groundwater protection issues, end-users, employed tools and output implemented in SOILCONSWEB-GCI.
